# Supplementary material for: Identification of conserved gene structures and carboxy-terminal motifs in the Myb gene family of Arabidopsis and Oryza sativa L. ssp. indica
Source: Springer Nature journal article supplement (doi:10.1186/gb-2004-5-7-r46), 2004-06-29
Supplement: Additional file 1 [file gb-2004-5-7-r46-s1.pdf]

The mapping relationship of subgroup designations

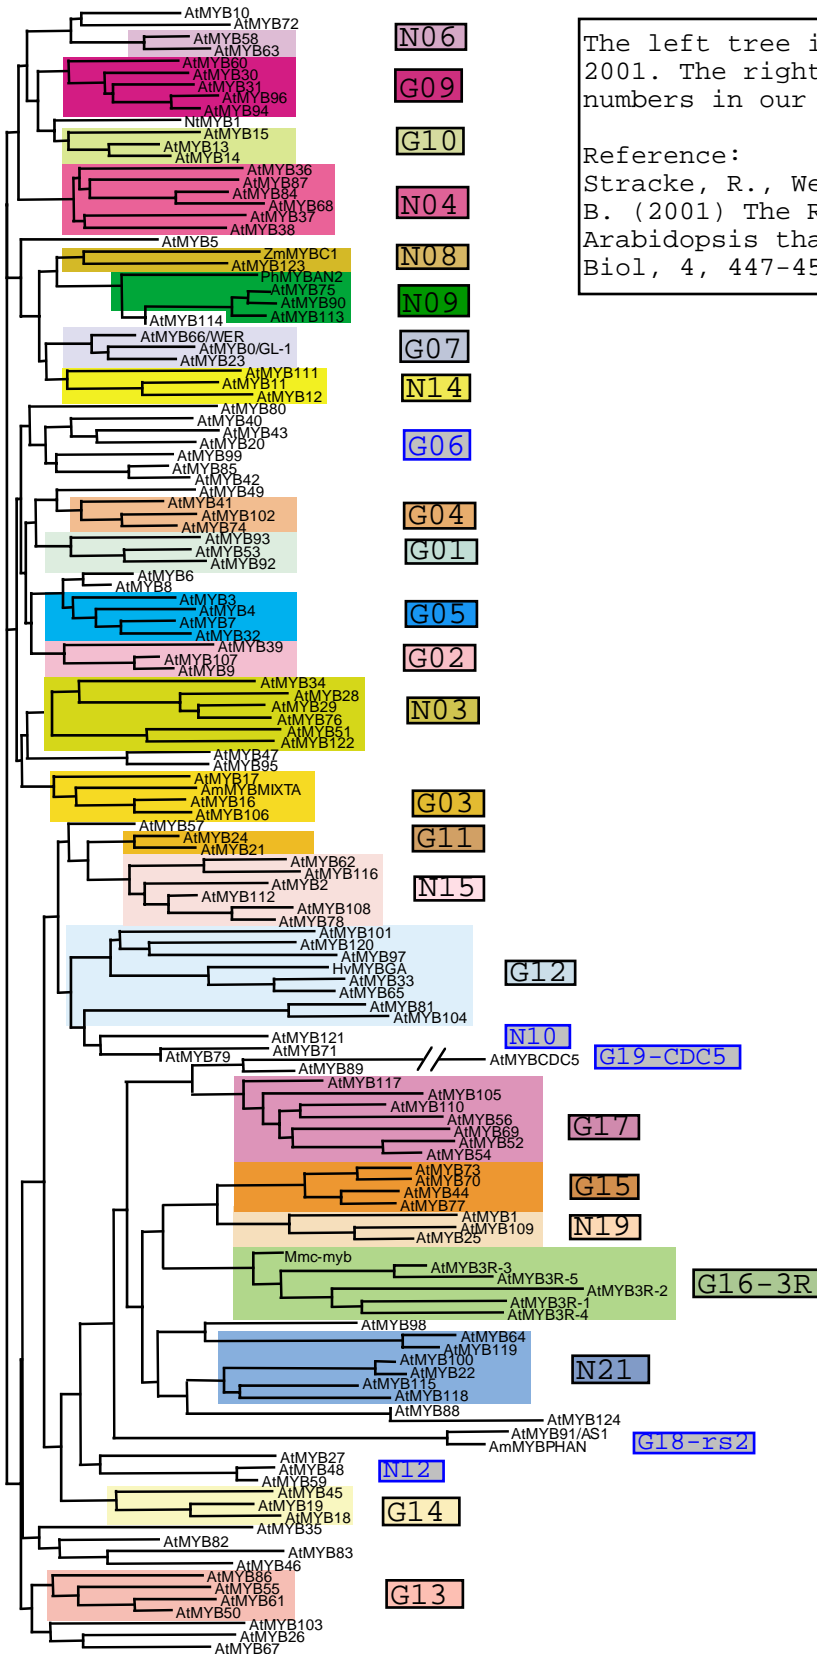

The left tree is from Stracke et al. 2001. The right labels are the subgroup numbers in our analysis (Fig. 1).

Reference:  
 Stracke, R., Werber, M., and Weisshaar, B. (2001) The R2R3-Myb gene family in Arabidopsis thaliana. Curr Opin Plant Biol, 4, 447-456.
