# Supplementary material for: Identification of conserved gene structures and carboxy-terminal motifs in the Myb gene family of Arabidopsis and Oryza sativa L. ssp. indica
Source: Springer Nature journal article supplement (doi:10.1186/gb-2004-5-7-r46), 2004-06-29
Supplement: Additional file 2 [file gb-2004-5-7-r46-s2.pdf]

**Table 1A**, Locations of intron 1

|               | At         | Os        |
|---------------|------------|-----------|
| Lack intron 1 | 15         | 15        |
| Lack Both     | 6          | 12        |
| NonT intron 1 | 0          | 0         |
| NonT Both     | 25         | 8         |
| Norm intron 1 | 84         | 50        |
| <b>Total</b>  | <b>130</b> | <b>85</b> |

**Table 1B**, Locations of intron 2

|               | At         | Os        |
|---------------|------------|-----------|
| Lack intron 2 | 9          | 6         |
| Lack Both     | 6          | 12        |
| NonT intron 2 | 0          | 4         |
| NonT Both     | 25         | 8         |
| Norm intron 2 | 90         | 55        |
| <b>Total</b>  | <b>130</b> | <b>85</b> |

**Table 2**, Distribution of intron 1 and 2 in R2R3 domains

| Size (bp) | At-I1 | At-I2 | Os-I1 | Os-I2 |
|-----------|-------|-------|-------|-------|
| <= 200    | 77%   | 69%   | 81%   | 74%   |
| <= 300    | 85%   | 74%   | 88%   | 82%   |
| <= 500    | 88%   | 88%   | 95%   | 88%   |
| <= 600    | 92%   | 90%   | 96%   | 89%   |
| <= 1000   | 99%   | 98%   | 97%   | 95%   |

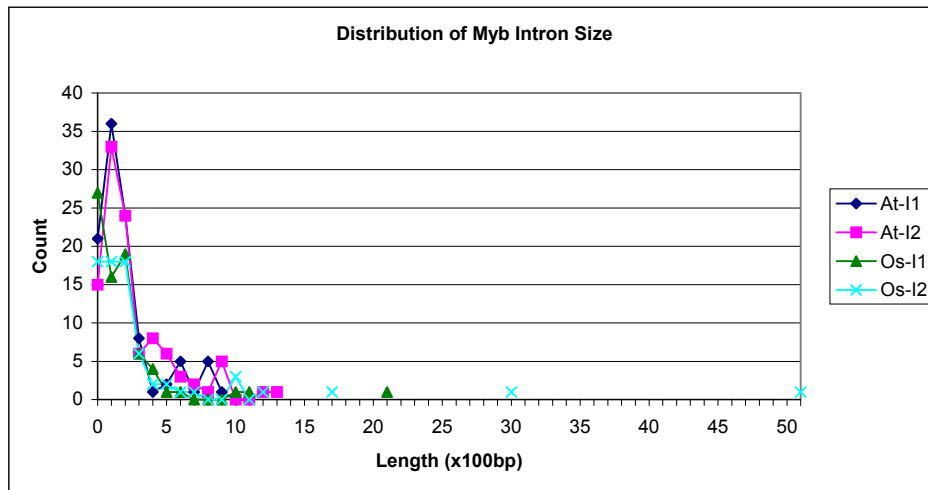

**Figure** Distribution of typical intron 1 and 2 in R2R3 domains in *Arabidopsis* and rice. Data points missing in traces for clarity are due to no introns found in that length.
