# Supplementary material for: Identification of conserved gene structures and carboxy-terminal motifs in the Myb gene family of Arabidopsis and Oryza sativa L. ssp. indica
Source: Springer Nature journal article supplement (doi:10.1186/gb-2004-5-7-r46), 2004-06-29
Supplement: Additional file 3 [file gb-2004-5-7-r46-s3.pdf]

**Table 1. Previously identified C-Term motifs but excluded in our analysis**

| Alias | E-Value  | Consensus Sequences                  |
|-------|----------|--------------------------------------|
| 3     | 1.4e-002 | WFKHLESELGLEEdDNQQQ                  |
| 5     | 4.5e-008 | DEEWLRChT                            |
| 11    | 1.2e-006 | RLDLLD[IL]SS[IL]L                    |
| 22.1  | 6.0e-006 | Vx[TA]GLYM                           |
|       |          |                                      |
| 1.1   | 2.1e-041 | YASSTENI[SA][RK]LLQ[GN]W             |
| 4     | 4.2e-048 | cPDLNL[ED]LrISPP                     |
| 6     | 3.9e-038 | [QL]K[IN][NG]VxKPRPRSF[ST]VNNxC[NS]H |
| 7     | 4.2e-047 | KRRGGRTx[GR]xssK                     |
| 12    | 8.5e-026 | SSS[ST][AS]RLLN[KR]VA                |
| 20    | 2.8e-044 | LWMPRLVERI                           |
| 25    | 1.6e-030 | L[EQ][ND]YI[KR]S[IL]xIN              |

**Note:** Alias indicates the corresponding motifs identified by Stracke et al. (2001). E-Value was calculated by MEME. The first four motifs have a big e-value ( $>1e-10$ ) so that they were excluded in our analysis. The rest of motifs did not pass nonsynonymous (dN) test, i.e., dN value in motif region is  $>0.7$ , or one of the flanking region has low dN value ( $\leq 0.5$ ).
