# Supplementary material for: Identification of conserved gene structures and carboxy-terminal motifs in the Myb gene family of Arabidopsis and Oryza sativa L. ssp. indica
Source: Springer Nature journal article supplement (doi:10.1186/gb-2004-5-7-r46), 2004-06-29
Supplement: Additional file 5 [file gb-2004-5-7-r46-s5.pdf]

**Table 3. Homologous EST hits from GenBank**

| Motif | Genbank GI No. of ESTs                                                                                                                                                                                                                                                                                                                                                                                                                                                                                                                                                                               |
|-------|------------------------------------------------------------------------------------------------------------------------------------------------------------------------------------------------------------------------------------------------------------------------------------------------------------------------------------------------------------------------------------------------------------------------------------------------------------------------------------------------------------------------------------------------------------------------------------------------------|
| E1    | <u>5843677</u> <sup>1</sup> , 21377108 <sup>2</sup> , 18257159 <sup>2</sup> , <u>906292</u> <sup>1</sup> , 9609685 <sup>2</sup> , 9363004 <sup>2</sup> , <u>8725610</u> <sup>2</sup> , 13119940 <sup>2</sup> , 13117218 <sup>1</sup> , 9609609 <sup>1</sup> , 22261008 <sup>2</sup> , 19878767 <sup>2</sup>                                                                                                                                                                                                                                                                                          |
| E2    | 16310275                                                                                                                                                                                                                                                                                                                                                                                                                                                                                                                                                                                             |
| E3    | 19877001                                                                                                                                                                                                                                                                                                                                                                                                                                                                                                                                                                                             |
| 2     | 24047454 <sup>#2</sup> , 22934063 <sup>#3</sup> , 9278726 <sup>#4</sup>                                                                                                                                                                                                                                                                                                                                                                                                                                                                                                                              |
| 7     | 19798907 <sup>#</sup>                                                                                                                                                                                                                                                                                                                                                                                                                                                                                                                                                                                |
| 9     | <u>8723927</u> <sup>#</sup> , 8716394 <sup>#</sup> , 5851413 <sup>#</sup> , 8724987, 26019636 <sup>1</sup> , <u>8726119</u> <sup>#1</sup> , <u>8723277</u> <sup>1</sup> , 28617714 <sup>1</sup> , 27446064 <sup>1</sup> , 18734995 <sup>1</sup> , 17021688 <sup>1</sup> , 16347988 <sup>1</sup> , 22525500 <sup>1</sup> , 13480528 <sup>1</sup> , 22525278 <sup>1</sup> , 15200035 <sup>1</sup> , 10232029 <sup>#1</sup> , 21285929 <sup>1</sup> , 17518756 <sup>1</sup> , 10236319 <sup>1</sup> , 9899127 <sup>1</sup> , 10709579 <sup>1</sup> , <u>8685347</u> <sup>1</sup> , 5820271 <sup>1</sup> |
| 10    | 19805828 <sup>#</sup> , <u>8723927</u> <sup>#</sup> , 8715463 <sup>#</sup> , 5843769 <sup>#</sup> , 8716394 <sup>#</sup> , 19824493 <sup>#1</sup> , 19836808 <sup>#1</sup> , 8702130 <sup>#1</sup> , 8703249 <sup>#1</sup> , 8703516 <sup>#4</sup>                                                                                                                                                                                                                                                                                                                                                   |
| 12    | 23999937 <sup>2</sup> , 24012501 <sup>2</sup> , 24009684 <sup>2</sup> , 19876981 <sup>2</sup>                                                                                                                                                                                                                                                                                                                                                                                                                                                                                                        |

**Note:** The superscript digits indicate the number of mismatches over C-terminal motifs at nucleotide level. Those incomplete ESTs without reaching Myb domains are indicated by #. Motif 14 and 15 from *CDC5* genes detected >100 ESTs not listed here. This result indicates that *CDC5* genes play an essential role in cell division cycle and are highly expressed in organisms. Underlined ESTs are identical over length to a Myb gene in the training data. (We assume a few mismatches as sequencing error if any.)
