# Supplementary material for: Identification of conserved gene structures and carboxy-terminal motifs in the Myb gene family of Arabidopsis and Oryza sativa L. ssp. indica
Source: Springer Nature journal article supplement (doi:10.1186/gb-2004-5-7-r46), 2004-06-29
Supplement: Additional file 7 [file gb-2004-5-7-r46-s7.doc]

**Figure**, Relationship of 130 *Arabidopsis,* 85 rice Myb proteins and 43 ‘landmark’ Myb proteins. The sequences were clustered using MEGA2 (Kumar et al. 2001). Seven singletons in red are hard to be clustered with any members. At least one C-terminal motif was identified in the 19 ‘G’ subgroups. In contrast, no motifs were found in the 23 ‘N’ subgroups.

The taxon names are genus species nomenclature followed by GI number in GenBank. For *Arabidopsis* Mybs, their locus numbers ares uded, and their names are given in the parenthesis, which are used in Stracke et al. 2001

**Ref**:

Kumar, S., Tamura, K., Jakobsen, I.B., and Nei, M. (2001) MEGA2: Molecular Evolutionary Genetics Analysis software, *Bioinformatics,* **17**:1244-1245.

Stracke, R., Werber, M., and Weisshaar, B. (2001) The R2R3-Myb gene family in *Arabidopsis thaliana*. *Curr Opin Plant Biol*, **4**, 447-456.
