# Supplementary material for: Identification of conserved gene structures and carboxy-terminal motifs in the Myb gene family of Arabidopsis and Oryza sativa L. ssp. indica
Source: Springer Nature journal article supplement (doi:10.1186/gb-2004-5-7-r46), 2004-06-29
Supplement: Additional file 8 [file gb-2004-5-7-r46-s8.pdf]

At1g34670  
 At5g10280  
 At5g65230  
 Scaffold5445\_1  
 Scaffold7137\_2  
 Scaffold9773\_1

**G01: m**

At3g02940  
 At4g17780  
 At5g16770  
 Scaffold11444\_1  
 Scaffold4085\_1

**G02: -I1**

At3g01140  
 At5g15310  
 Scaffold2816\_1  
 Scaffold474\_1  
 Scaffold951\_5  
 Scaffold1247\_2

**G03: m**

At4g28110  
 At4g21440  
 At4g05100  
 At5g54230  
 Scaffold9777\_1

**G04: m**

At1g22640  
 At2g16720  
 At4g09460  
 At4g38620  
 At4g34990  
 At928969-Y49  
 Scaffold15586\_1  
 Scaffold321\_3  
 Scaffold87\_1  
 Scaffold987\_1  
 Scaffold987\_3

**G05: m, -I1**

At1g66230  
 At4g12350  
 At4g22680  
 At5g16600  
 Scaffold13580\_1  
 Scaffold1873\_3  
 Scaffold3089\_4  
 Scaffold3266\_2  
 Scaffold6283\_1  
 Scaffold755\_5

**G06: m, -I1**

At3g27920  
 At5g14750  
 At5g40330  
 At166780-GL1  
 At6601337-WER  
 At3g28470

**G07: m**

At5g56110  
 At5163509-Myb103  
 Scaffold558\_5  
 Scaffold9672\_1

**G08: m**

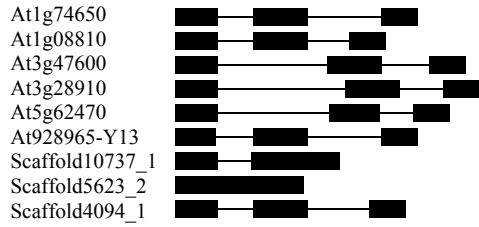

**G09: m, -I2, 0**

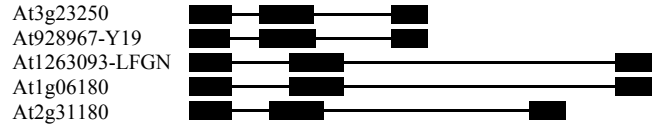

**G10: m**

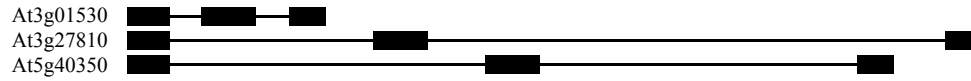

**G11: m**

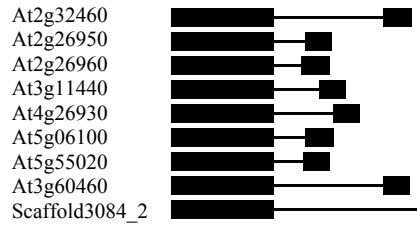

**G12: n**

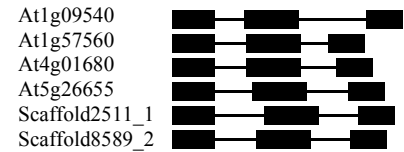

**G13: m**

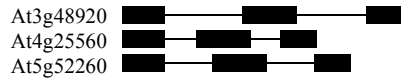

**G14: m**

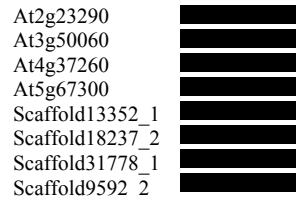

**G15: 0**

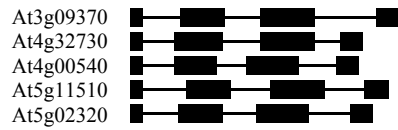

**G16: n**

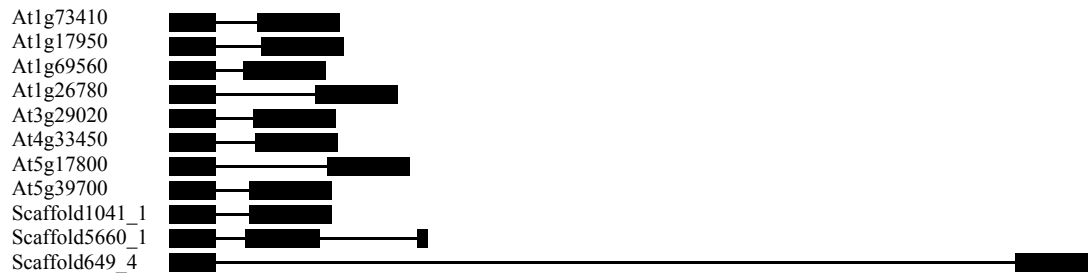

**G17: -I2, n**

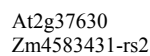

**G18: 0**

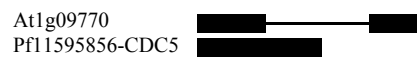

**G19: n, 0**

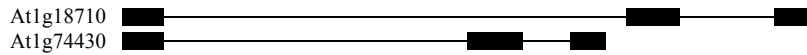

**N01: m**

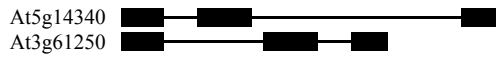

**N02: m**

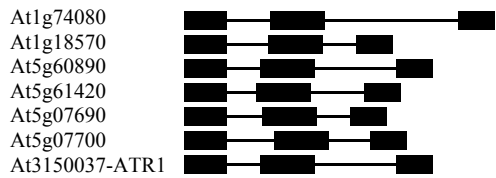

**N03: m**

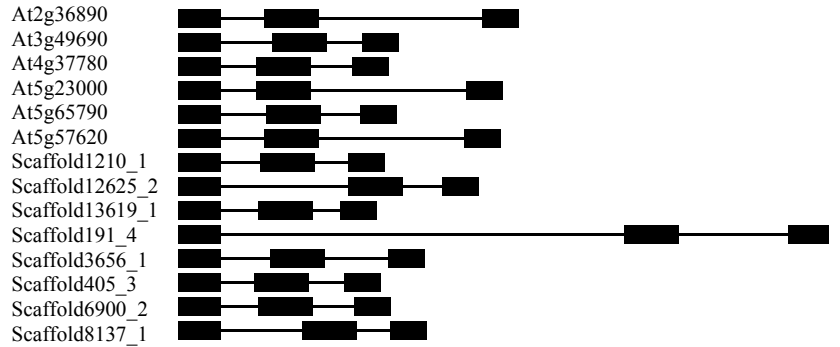

**N04: m**

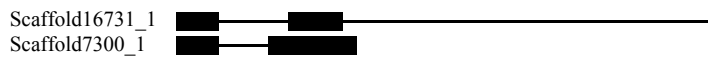

**N05: m, -I2**

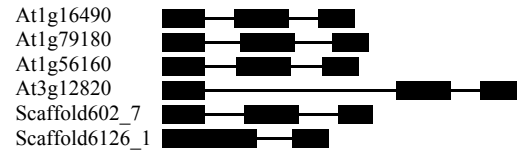

**N06: m, -I1**

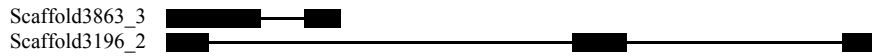

**N07: m, -I1**

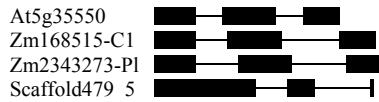

**N08: m, n**

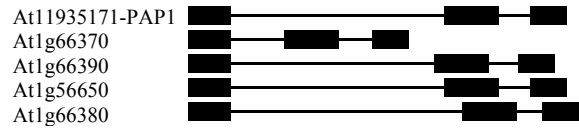

**N09: m**

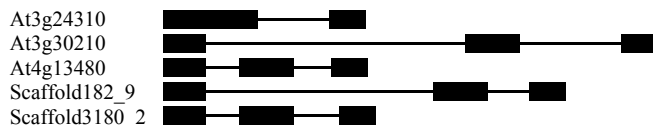

**N10: m, -I1**

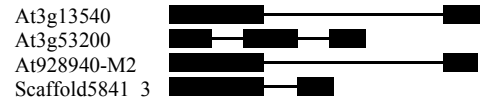

**N11: m, -I1**

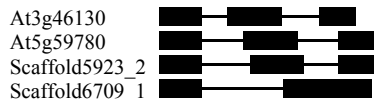

**N12: m, -I2**

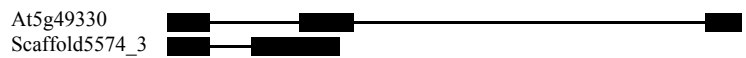

**N13: m, -I2**

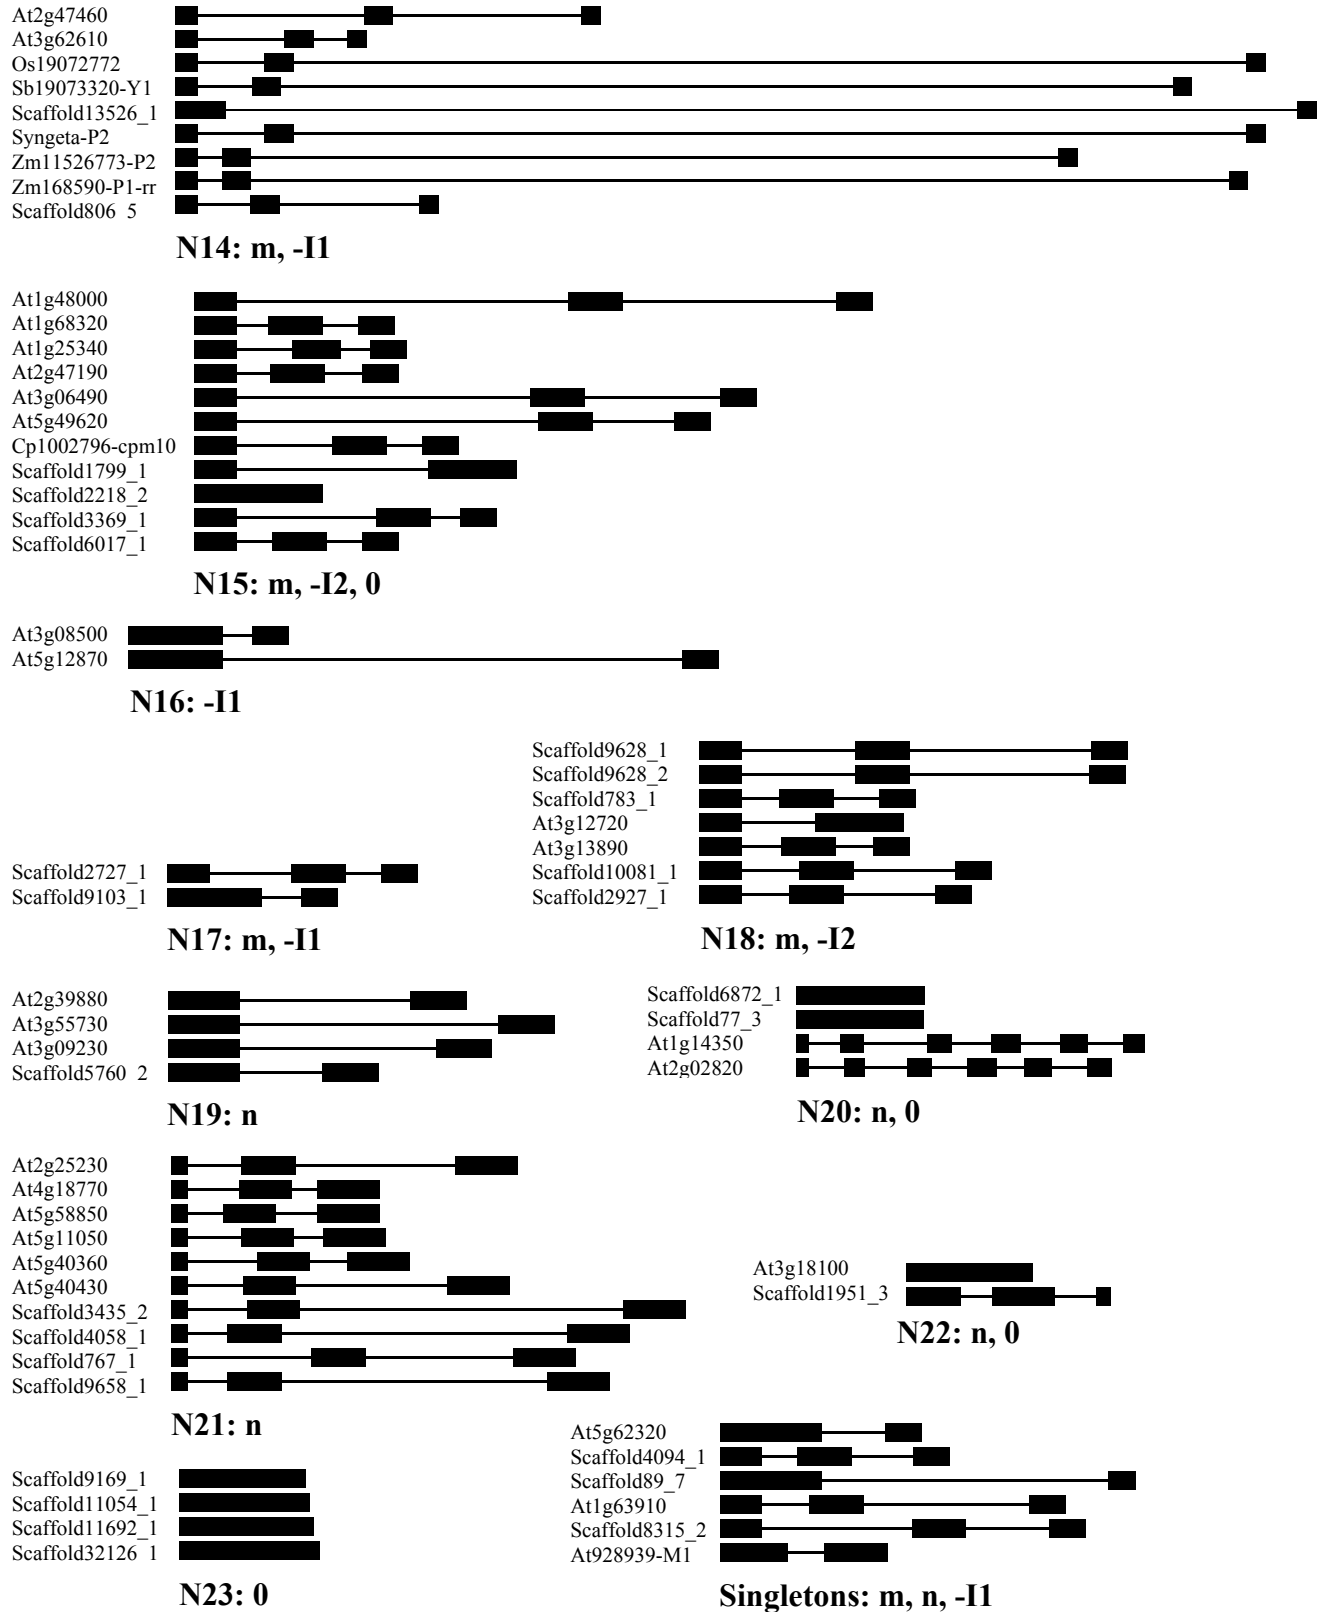

**Figure** The conserved exon-intron structure in R2R3 domains of all member genes within each subgroup. Boxes and lines indicate exons and introns, respectively. m indicates the major splicing pattern typified by G13; -I1 and -I2 stand for the typical splicing pattern with lack intron 1 and intron 2, respectively; n indicates non-major splicing patterns; and 0 indicates no introns in the Myb R2R3 domains.
